# Supplementary material
Source: Research Square preprint supplement (doi:10.21203/rs.3.rs-9161019/v1)
Supplement: Supplementary file 1 [file 47928ccbd85617bce7a3432f.docx]

**Supplementary Materials to:**

**Comparative Effectiveness of Radical Surgery versus Concurrent Chemoradiotherapy in Stage IB3, IIA2, or IIICr Cervical Cancer: A Prospective, Multicenter, Propensity Score-Matched Cohort Study**

**Supplementary Treatment Plan**……………………………………………………………………………………………………....2

**Table S1.** The recommended adjuvant therapy for patients with high-risk factors……………….…...3

**Table S2.** Sedlis’ criteria for external pelvic radiation after radical surgery in node-negative, margin-negative, parametria-negative cases………………………………………………………………………………….….…4

**Table S3.** The details of the chemotherapy schedule and radiotherapy technique………….……….5

**Table S4.** Postoperative follow-up schedule………………………………………………………………….……………….6

**Table S5.** Baseline characteristics and adverse effects before propensity score matching ……7-9

**Table S6.** Standardized mean difference (SMD) before and after propensity score matching…10

**Supplementary Figure 1.** Kaplan-Meier analysis of distant metastasis-free survival (DMFS) between the RS group and the definitive CCRT group after 1:3 PSM…………………………………………….11

**Supplementary Figure 2.** Kaplan-Meier analysis of OS and PFS between the RS subgroup with consistent preoperative and postoperative FIGO staging and the definitive CCRT group after 1:3 PSM……………………………………………………………….…………………………………………………………….………………12

**Supplementary Figure 3**. Kaplan-Meier analysis of distant metastasis-free survival (DMFS) between the tumor-free laparoscopic RS group and the open RS group after 1:1 PSM……………….13

**Supplementary Figure 4.** Kaplan–Meier analysis of PFS between the tumor-free laparoscopic RS subgroup with consistent preoperative and postoperative FIGO staging and the definitive CCRT group after 1:3 PSM.…………….……………………………………………………….…………………………………………14

**Supplementary Figure 5.** Subgroup Kaplan-Meier analysis of OS and PFS between the tumor-free laparoscopic RS group and the definitive CCRT group after 1:3 PSM…….……………………………15

**Supplementary Figure 6.** Subgroup Kaplan-Meier analysis of OS and PFS between the open RS group and the definitive CCRT group after 1:3 PSM…………….…………………………………………….…16

**Supplementary Figure 7.** Kaplan-Meier analysis of OS and PFS between the RS group and the definitive CCRT group after 1:2 PSM………………………………………………………………………………………….17

**Supplementary Treatment Plan**

Histopathological verification adheres to the WHO 2014 classification standards through dual independent review by board-certified gynecologic pathologists. Discordant cases undergo consensus review via multidisciplinary tumor board deliberation.

All histopathological diagnoses were confirmed according to the WHO 2014 classification criteria through independent dual review by board-certified gynecologic pathologists, with discordant cases resolved by multidisciplinary tumor board consensus.

Postoperative adjuvant therapy was administered based on standardized protocols: 1) For patients with high-risk features (lymph node metastasis, positive surgical margins, or parametrial involvement), treatment followed current NCCN guidelines **(Tables S1-S2)**; 2) Intermediate-risk squamous cell carcinoma cases were managed according to Sedlis criteria incorporating tumor size, depth of stromal invasion, and LVSI status **(Table S3)**; 3) For adenocarcinoma/adenosquamous carcinoma cases, adjuvant therapy was indicated when ≥2 of the following NCCN-defined risk factors were present: specific histology, LVSI positivity, deep stromal invasion (outer third), or tumor size >3 cm (**Tables S1-S2)**.

Intensity-modulated external-beam radiotherapy (EBRT) was delivered at 45-50.4 Gy in 25-28 fractions (1.8 Gy/fraction, 5 fractions/week) with concurrent weekly cisplatin (40 mg/m²) starting on the first treatment day, while three-dimensional high-dose-rate brachytherapy (BT) was administered at week five using either 6 Gy×5 or 7 Gy×4 fractions (twice weekly) to the high-risk clinical target volume. Dose objectives required EQD2 ≥80 Gy for tumors <4 cm and ≥85 Gy for tumors ≥4 cm, with normal tissue constraints maintaining 2-mL doses of ≤65-75 Gy for rectum, ≤70-75 Gy for sigmoid, and ≤80-90 Gy for bladder, with treatment modifications implemented when necessary to stay within safe thresholds, though the combined intracavitary/interstitial approach typically achieved optimal dose distribution without exceeding organ limits. For cases with suspected lymph node metastases or parametrial invasion, boost radiation was delivered 60 Gy within normal tissue constraints, while common iliac/para-aortic nodal metastases received extended-field radiotherapy with simultaneous integrated boost (SIB) to 60-66 Gy, and parametrial invasion cases were treated with parametrial SIB to 60 Gy.

**Table S1. The recommended adjuvant therapy for patients with high-risk factors**

| High-risk pathological factors | Recommended adjuvant therapy |
| --- | --- |
| Parametrial involvement | External-beam radiotherapy (EBRT) + platinum-containing concurrent chemotherapy |
| Vaginal resection margin involvement | EBRT + platinum-containing concurrent chemotherapy + vaginal brachytherapy |
| Pelvic lymph node metastasis | EBRT + platinum-containing concurrent chemotherapy |

*Patients with para-aortic lymph node (PALN) metastasis by pathological confirmation or imaging evaluation should receive extended field radiotherapy.

*The recommended adjuvant therapy for squamous cell carcinoma patients who meet the Sedlis criteria is EBRT **±** platinum-containing concurrent chemotherapy.

**Table S2. Sedlis' criteria for external pelvic radiation after radical surgery in node-negative, margin-negative, parametria-negative cases**

| LVSI | Stromal Invasion | Tumor size (cm) (determined by clinical palpation) |
| --- | --- | --- |
| + | Deep 1/3 | Any |
| + | Middle 1/3 | ≥ 2 |
| + | Superficial 1/3 | ≥ 5 |
| - | Middle or Deep 1/3 | ≥ 4 |

*For adenocarcinoma and adenosquamous carcinoma, patients who meet the criteria of (1) +(2)/ (3)/ (4) need additional concurrent chemoradiotherapy (EBRT **±** platinum-containing concurrent chemotherapy).

(1) histology (adenocarcinoma or adenosquamous carcinoma); (2) LVSI+; (3) stromal infiltration of the outer 1/3 of the uterine cervix; (4) tumor size larger than 3 cm

**Table S3. The details of the chemotherapy schedule and radiotherapy technique**

| EBRT | Technology: IMRT  Treatment time: 4 weeks after surgery; < 8 weeks after surgery.  Therapeutic dose: EBRT is administered at a dose of 45-50.4 Gy in 25-28 fractions at a daily fraction of 1.8-2.0 Gy, 5 days per week.  Large unresectable metastatic lymph nodes require an additional simultaneous integrated boost (SIB) up to 2.1-2.4Gy.  In patients with parametrial invasion, SIB aiming for a total dose of 60 Gy is given.  In patients with pelvic lymph node, para-aortic lymph node, or retroperitoneal lymph node involvement, a SIB aiming for a total dose of 60-66 Gy is given. |
| --- | --- |
| Platinum-containing concurrent chemotherapy | Cisplatin (DDP) 40mg/m2/w starting on the first 2 days of the first week of EBRT for 5-6 cycles. |
| Vaginal brachytherapy | Technology: HDR, 3D  The total therapeutic dose depends on the residual condition.  The prescription is typically at 5mm below the vaginal surface.  Patients with close (R0) or positive (R1) vaginal mucosal surgical margins: equivalent dose at 2 Gy (EQD2) 70Gy.  Patients with imaging and visible lesions (R2): equivalent dose at 2 Gy (EQD2) 75-85Gy. |

**Table S4. Postoperative follow-up schedule**

| Postoperative time point (months) | Physical exam | LCT | HPV | Biomarkers | Imaging | | Recurrence and survival | Quality of life | Side effects of adjuvant therapy |
| --- | --- | --- | --- | --- | --- | --- | --- | --- | --- |
| (SCCA, CA125, CA199, HE4, CEA | Ultrasound | CT, enhanced pelvic MRI, PET-CT |
| 1 | √ |  |  | √ | √ |  |  | √ |  |
| 3 | √ | √ |  | √ | √ |  | √ |  | √ |
| 6 | √ | √ | √ | √ | √ | √ | √ | √ | √ |
| 9 | √ | √ |  | √ | √ |  | √ |  |  |
| 12 | √ | √ | √ | √ | √ | √ | √ | √ | √ |
| 15 | √ | √ |  | √ | √ |  | √ |  |  |
| 18 | √ | √ | √ | √ | √ | √ | √ | √ | √ |
| 21 | √ | √ |  | √ | √ |  | √ |  |  |
| 24 | √ | √ | √ | √ | √ | √ | √ | √ | √ |
| 30 | √ | √ |  | √ | √ |  | √ |  |  |
| 36 | √ | √ | √ | √ | √ | √ | √ | √ | √ |
| 42 | √ | √ |  | √ | √ |  | √ |  |  |
| 48 | √ | √ | √ | √ | √ | √ | √ | √ | √ |
| 54 | √ | √ |  | √ | √ |  | √ |  |  |
| 60 | √ | √ | √ | √ | √ | √ | √ | √ | √ |

**Table S5. Baseline characteristics and adverse effects before propensity score matching**

| **Variables** | **Treatment strategy** | | | |  | **Surgical approach** | | | | | |
| --- | --- | --- | --- | --- | --- | --- | --- | --- | --- | --- | --- |
| **Radical surgery (RS) group**  **(n = 198)** | **Definitive CCRT** † **group (n = 48)** | **t/χ2/Z** | **p value** |  | **Tumor-free laparoscopic RS group (n = 119)** | **Open RS group (n = 79)** | **χ2/W** | **p value** | | |
| **Age (median [IQR])** | 53 [46, 58] | 53 [49, 61] | -1.644 a | 0.104 |  | 54 [48, 58] | 52 [45, 58] | 1.439 a | 0.152 | | |
| **Histological type** |  |  | 2.254 **b** | 0.133 |  |  |  | 0.835 b | 0.361 | | |
| Squamous cell carcinoma | 86.87% (172/198) | 95.83% (46/48) |  |  |  | 89.08% (106/119) | 83.54% (66/79) |  |  | | |
| Adenosquamous carcinoma/ Adenocarcinoma | 13.13% (26/198) | 4.17% (2/48) |  |  |  | 10.92% (13/119) | 16.46% (13/79) |  |  | | |
| **Maximum tumor diameter, cm** | 6.59 ± 1.77 | 5.67 ± 1.64 | 3.433 a | 0.001 * |  | 6.40 ± 1.74 | 6.87 ± 1.78 | -1.837 a | 0.068 | | |
| **FIGO stage** |  |  | 1.911 **c** | 0.056 |  |  |  | 3.129 b | 0.372 | | |
| I B3 | 17.68% (35/198) | 6.25% (3/48) |  |  |  | 19.33% (23/119) | 15.19% (12/79) |  | | |  |
| II A2 | 27.78% (55/198) | 18.75% (9/48) |  |  |  | 30.25% (36/119) | 24.05% (19/79) |  | | |  |
| III C1R | 47.47% (94/198) | 66.67% (32/48) |  |  |  | 45.38% (54/119) | 50.63% (40/79) |  | | |  |
| III C2R | 7.07% (14/198) | 8.33% (4/48) |  |  |  | 5.04% (6/119) | 10.13% (8/79) |  | | |  |
| **FIGO stage III** |  |  | 2.575 b | 0.109 |  |  |  | 0.185 b | | | 0.667 |
| Maximum tumor diameter ≤4 cm | 12.04% (13/108) | 25.00% (9/36) |  |  |  | 10.00% (6/60) | 14.58% (7/48) |  | | |  |
| Maximum tumor diameter > 4 cm | 87.96% (95/108) | 75.00% (27/36) |  |  |  | 90.00% (54/60) | 85.42% (41/48) |  | | |  |
| **Imaging-detected lymph node metastasis** | 55.56% (110/198) | 75.00% (36/48) | 5.275 b | 0.022 * |  | 52.10% (62/119) | 60.76% (48/79) | 1.112 b | | | 0.291 |
| Pelvic lymph nodes | 12.12% (24/198) | 20.83% (10/48) | 1.785 b | 0.182 |  | 11.76% (14/119) | 12.66% (10/79) | < 0.001 b | | | > 0.999 |
| Parametrial nodes | 4.04% (8/198) | 8.33% (4/48) | 1.134 **c** | 0.257 |  | 5.88% (7/119) | 1.27% (1/79) | 1.447 c | | | 0.148 |
| Iliac lymph nodes | 44.44% (88/198) | 56.25% (27/48) | 1.715 b | 0.190 |  | 42.86% (51/119) | 46.84% (37/79) | 0.165 b | | | 0.685 |
| Inguinal nodes | 4.04% (8/198) | 10.42% (5/48) | 1.476 **c** | 0.140 |  | 5.04% (6/119) | 2.53% (2/79) | 0.705 c | | | 0.481 |
| Retroperitoneal nodes | 4.55% (9/198) | 14.58% (7/48) | 2.326 **c** | 0.020 * |  | 2.52% (3/119) | 7.59% (6/79) | 1.405 c | | | 0.160 |
| Paraaortic nodes | 7.58% (15/198) | 8.33% (4/48) | 0.291 **c** | 0.771 |  | 6.72% (8/119) | 8.86% (7/79) | 0.080 b | | | 0.778 |
| **Medically managed comorbidities** |  |  |  |  |  |  |  |  | | |  |
| Hypertension | 16.16% (32/198) | 16.67% (8/48) | < 0.001 b | > 0.999 |  | 21.01% (25/119) | 8.86% (7/79) | 4.313 b | | | 0.038 * |
| Diabetes | 6.57% (13/198) | 14.58% (7/48) | 1.751 c | 0.080 |  | 6.72% (8/119) | 6.33% (5/79) | < 0.001 b | | | > 0.999 |
| Anemia | 15.15% (30/198) | 14.08% (7/48) | < 0.001 b | > 0.999 |  | 11.76% (14/119) | 20.25% (16/79) | 2.042 b | | | 0.153 |
| **CCRT treatment strategy** |  |  |  |  |  |  |  |  | | |  |
| CCRT + brachytherapy | — | 95.84% (46/48) |  |  |  | — | — |  | | |  |
| CCRT | — | 2.08% (1/48) |  |  |  | — | — |  | | |  |
| Unknown | — | 2.08% (1/48) |  |  |  | — | — |  | | |  |
| **Department of surgery** ‡ |  |  |  |  |  |  |  | 1.431 b | | | 0.232 |
| Gynecologic oncology | 77.27% (153/198) | — |  |  |  | 73.95% (88/119) | 82.28% (65/79) |  | | |  |
| General gynecology | 22.73% (45/198) | — |  |  |  | 26.05% (31/119) | 17.72% (14/79) |  | | |  |
| **Surgical procedure** ‡ |  |  |  |  |  |  |  |  | | |  |
| Open surgery | 40.00% (79/198) | — |  |  |  | — | — |  | | |  |
| Tumor-free laparoscopic surgery | 60.00% (119/198) | — |  |  |  | — | — |  | | |  |
| **Adjuvant therapy** ‡ |  |  |  |  |  |  |  | 0.156 c | | | 0.876 |
| Chemoradiotherapy + brachytherapy | 19.19% (38/198) | — |  |  |  | 19.33% (23/119) | 18.99% (15/79) |  | | |  |
| Chemoradiotherapy | 77.27% (153/198) |  |  |  |  | 76.47% (91/119) | 78.48% (62/79) |  | | |  |
| Unknown | 3.54% (7/198) | — |  |  |  | 4.20% (5/119) | 2.53% (2/79) |  | | |  |
| **Cervical stromal invasion** ‡ |  |  |  |  |  |  |  | 1.645 c | | | 0.100 |
| Superficial invasion | 2.53% (5/198) | — |  |  |  | 3.36% (4/119) | 1.27% (1/79) |  | | |  |
| Intermediate invasion | 6.06% (12/198) | — |  |  |  | 7.56% (9/119) | 3.80% (3/79) |  | | |  |
| Deep invasion | 37.37% (74/198) | — |  |  |  | 42.02% (50/119) | 30.38% (24/79) |  | | |  |
| Full-thickness invasion | 54.04% (107/198) | — |  |  |  | 47.06% (56/119) | 64.56% (51/79) |  | | |  |
| **Positive surgical margins** ‡ | 18.18% (36/198) | — |  |  |  | 17.65% (21/119) | 18.99% (15/79) | 0.003 b | | | 0.959 |
| **Perineural invasion** | 15.15% (30/198) | — |  |  |  | 10.92% (13/119) | 21.52% (17/79) | 3.362 b | | | 0.067 |
| **Parametrial invasion** ‡ |  |  |  |  |  |  |  | 2.738 b | | | 0.254 |
| None | 70.20% (139/198) | — |  |  |  | 72.27% (86/119) | 67.09% (53/79) |  | | |  |
| Unilateral infiltration | 22.22% (44/198) | — |  |  |  | 22.69% (27/119) | 21.52% (17/79) |  | | |  |
| Bilateral infiltration | 7.58% (15/198) | — |  |  |  | 5.04% (6/119) | 11.39% (9/79) |  | | |  |
| **Vaginal invasion** ‡ |  |  |  |  |  |  |  | 1.347 c | | | 0.178 |
| None | 41.92% (83/198) | — |  |  |  | 47.06% (56/119) | 34.18% (27/79) |  | | |  |
| Upper third | 55.05% (109/198) | — |  |  |  | 49.58% (59/119) | 63.29% (50/79) |  | | |  |
| Middle third | 3.03% (6/198) | — |  |  |  | 3.36% (4/119) | 2.53% (2/79) |  | | |  |
| Recurrence |  |  |  |  |  |  |  |  | | |  |
| Local recurrenced | 3.03% (6/198) | — | — | — |  | 3.36% (4/119) | 2.53% (2/79) | < 0.001 c | | | > 0.999 |
| Distant recurrencee | 21.21% (42/198) | 22.92% (11/48) | 0.004 b | 0.951 |  | 20.17% (24/119) | 22.78% (18/79) | 0.069 b | | | 0.792 |
| Unknown | 0.51% (1/198) | 2.08% (1/48) | 0.929 c | 0.353 |  | — | 1.27% (1/79) | — | | | — |
| **Adverse events** |  |  |  |  |  |  |  |  | | |  |
| Myelosuppression | 11.62% (23/198) | 62.50% (30/48) | 56.207 b | < 0.001 * |  | 4.20% (5/119) | 22.78% (18/79) | 14.211 b | | < 0.001 * | |
| Gastrointestinal symptoms | 12.12% (24/198) | 22.92% (11/48) | 2.858 b | 0.091 |  | 9.24% (11/119) | 16.46% (13/79) | 1.691 b | | | 0.194 |
| Anemia | 1.01% (2/198) | 16.67% (8/48) | > 0.999 c | < 0.001 * |  | 0.84% (1/119) | 1.27% (1/79) | < 0.001 c | | | > 0.999 |
| Edema | 34.85% (69/198) | 2.08% (1/48) | 18.795 b | < 0.001 * |  | 36.13% (43/119) | 32.91% (26/79) | 0.098 b | | | 0.754 |
| Urinary system symptoms | 25.25% (50/198) | 2.08% (1/48) | 11.249 b | 0.001 * |  | 29.41% (35/119) | 18.99% (15/79) | 2.209 b | | | 0.137 |
| Incisional pain | 16.16% (32/198) | 18.75% (9/48) | 0.047 b | 0.829 |  | 11.76% (14/119) | 22.78% (18/79) | 3.481 b | | | 0.062 |
| Liver dysfunction | — | 8.33% (4/48) | — | — |  | — | — | — | | | — |
| Intestinal fistula | 0.51% (1/198) | 2.08% (1/48) | 0.929 c | 0.353 |  | — | 1.27% (1/79) | — | | | — |

a T-test b Chi-square test c Fisher's exact Test d Local recurrence included tumor and lymph metastasis located in the pelvic

e Distant recurrence included distant metastasis beyond pelvic and lymph metastasis in the para-aortic area * p < 0.05

† Concurrent chemoradiotherapy  ‡Surgical approaches and postoperative parameters in radical surgery with adjuvant therapy group

**Table S6.** **Standardized mean difference (SMD) before and after propensity score matching**

| **PSM variable** | **Treatment strategy**  **Radical surgery (RS) vs Definitive CCRT** | | **Surgical approach**  **Tumer-free laparoscopic RS vs Open RS** | |
| --- | --- | --- | --- | --- |
| **SMD before PSM** | **SMD after PSM** | **SMD before PSM** | **SMD after PSM** |
| **Age** | 0.259 | 0.020 | 0.211 | 0.010 |
| **Histological type** | 0.322 | 0.039 | 0.161 | 0.047 |
| **Maximum tumor diameter** | 0.540 | 0.172 | 0.267 | 0.017 |
| **FIGO stage** | 0.472 | 0.138 | 0.255 | 0.061 |
| **Lymph node metastasis** | 0.415 | 0.115 | 0.174 | 0.058 |

SMD interpretation: 0-0.2, almost no difference; 0.2-0.5, little difference; 0.5-0.8, medium difference; 0.8-1.0, big difference. (Note: 1:3 PSM was used for radical surgery (RS) vs definitive CCRT, and 1:1 PSM for tumor-free laparoscopic RS vs open RS. After PSM, all SMDs < 0.2, indicating good baseline balance between groups.)

**
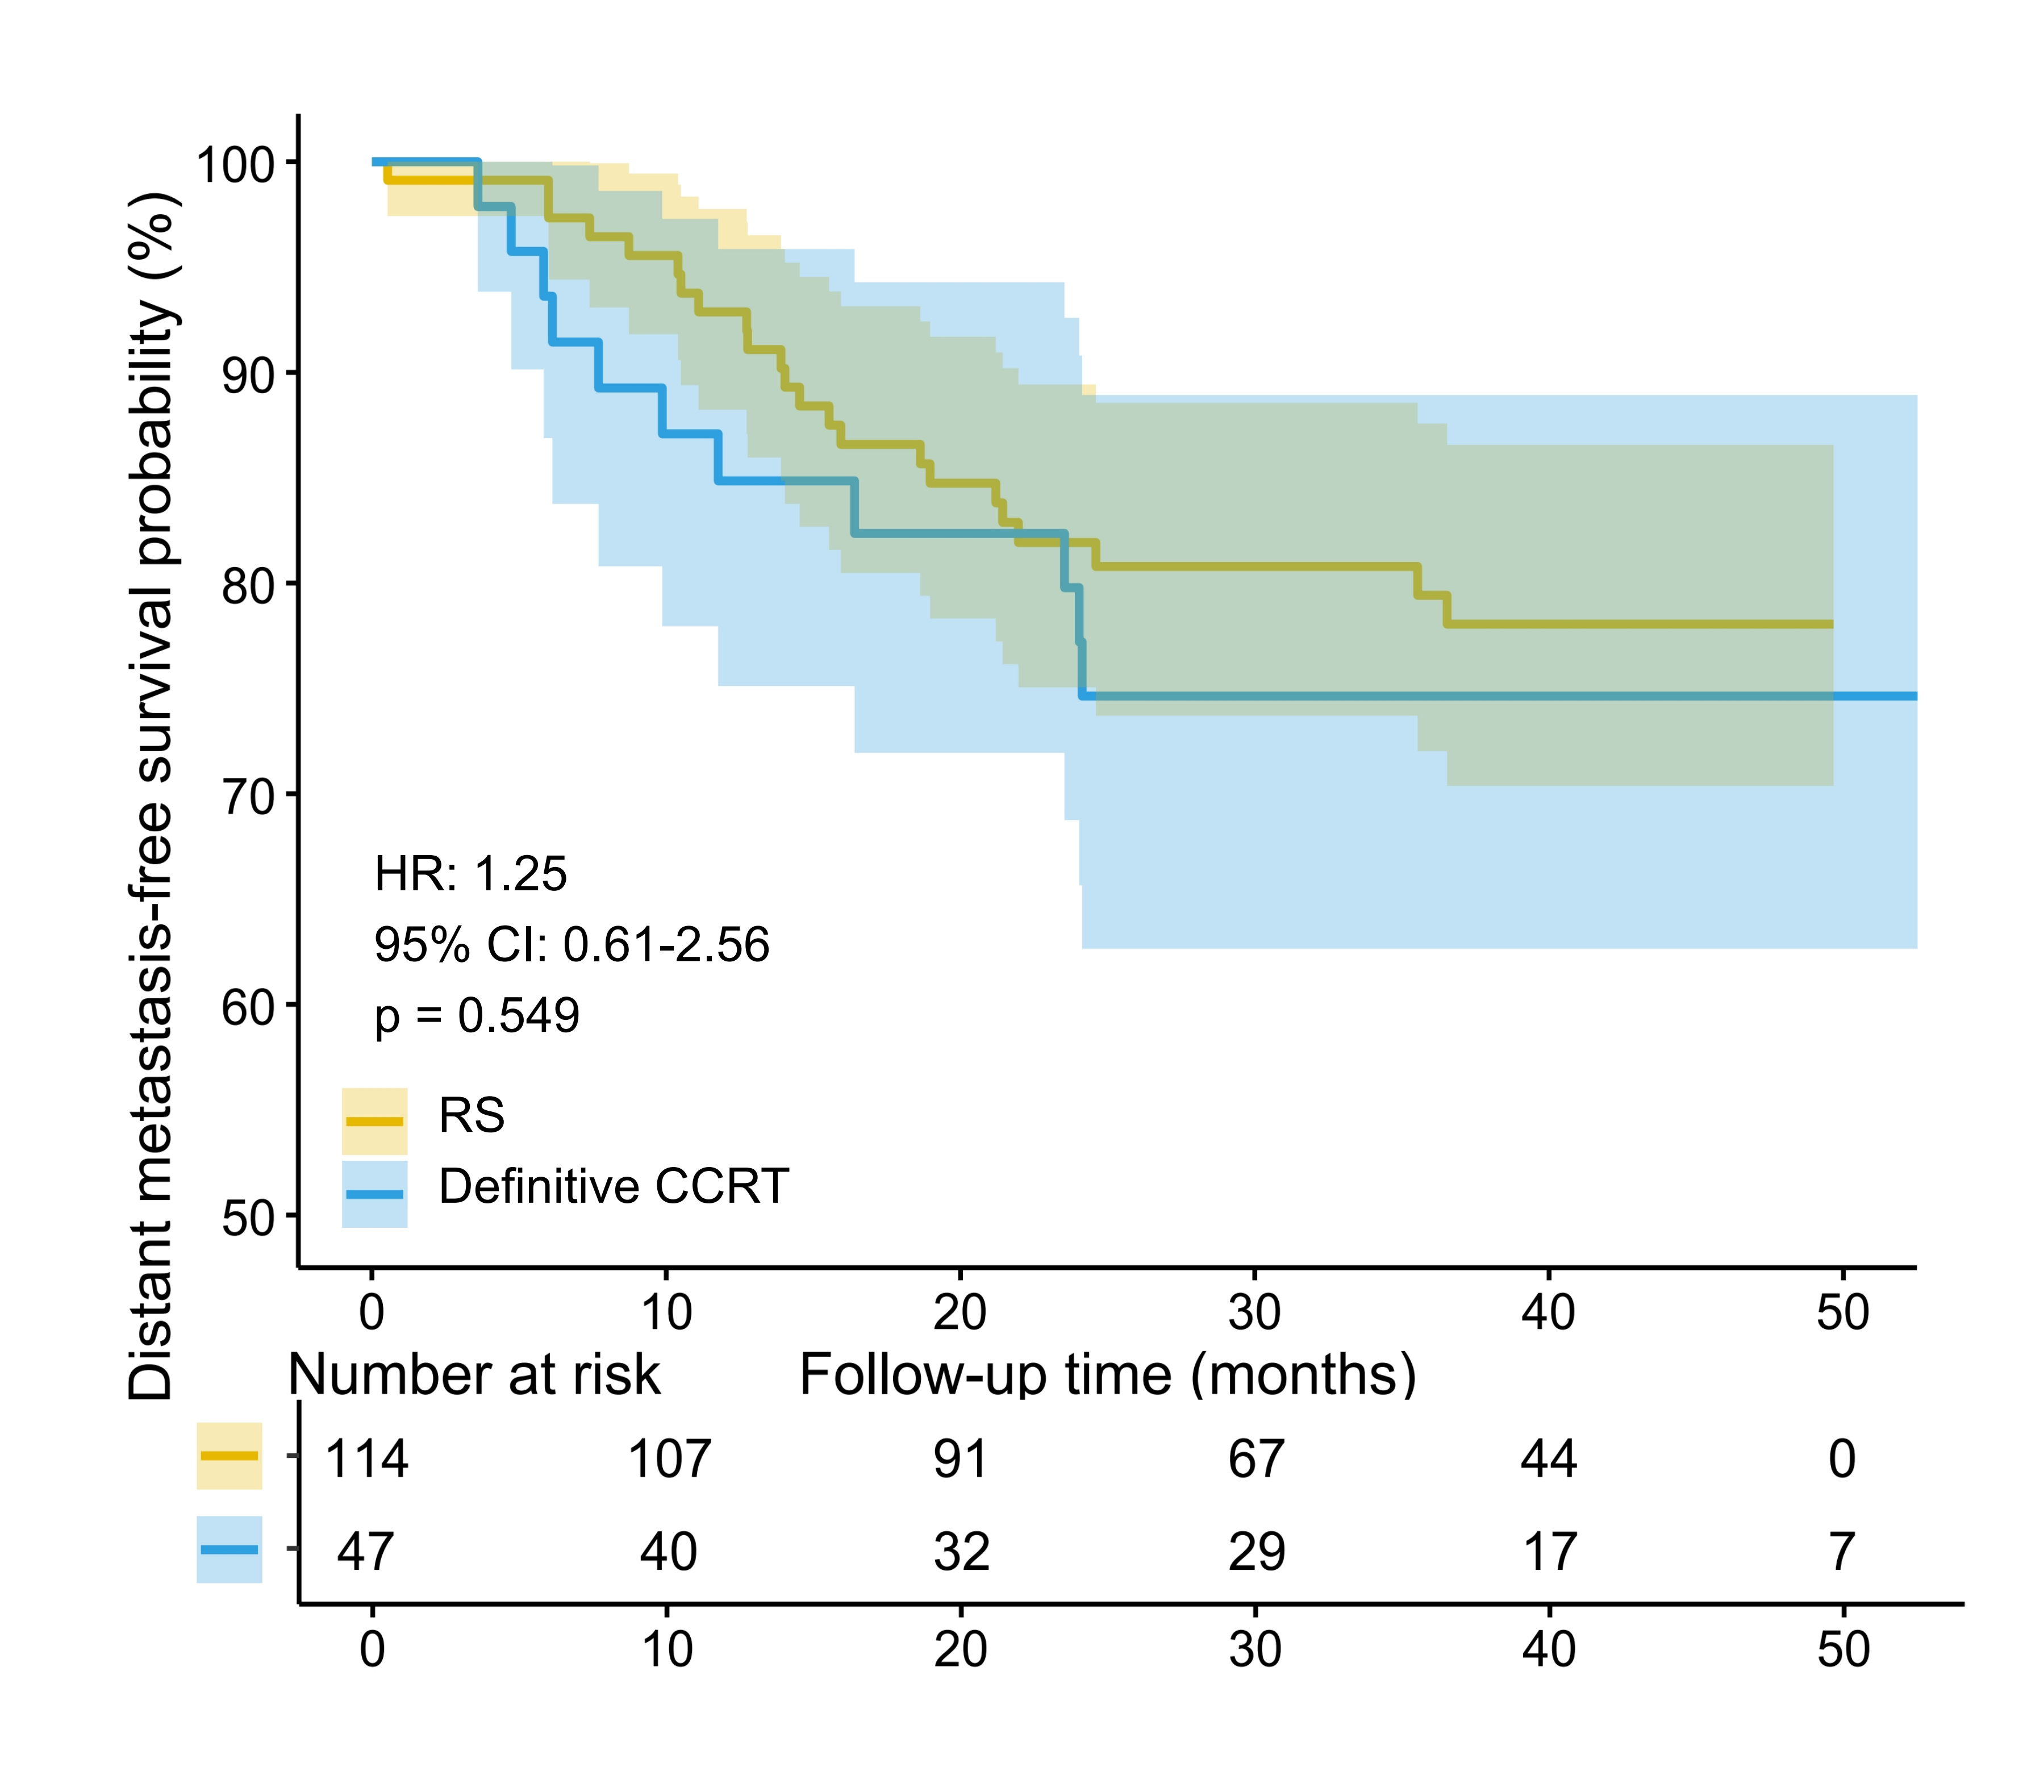
**

**Supplementary Figure 1. Kaplan-Meier analysis of distant metastasis-free survival (DMFS) between the RS group and the definitive CCRT group after 1:3 PSM**

The Kaplan-Meier analysis comparing the RS group and the definitive CCRT group after 1:3 PSM revealed no statistically significant differences in distant metastasis-free survival between the two groups.


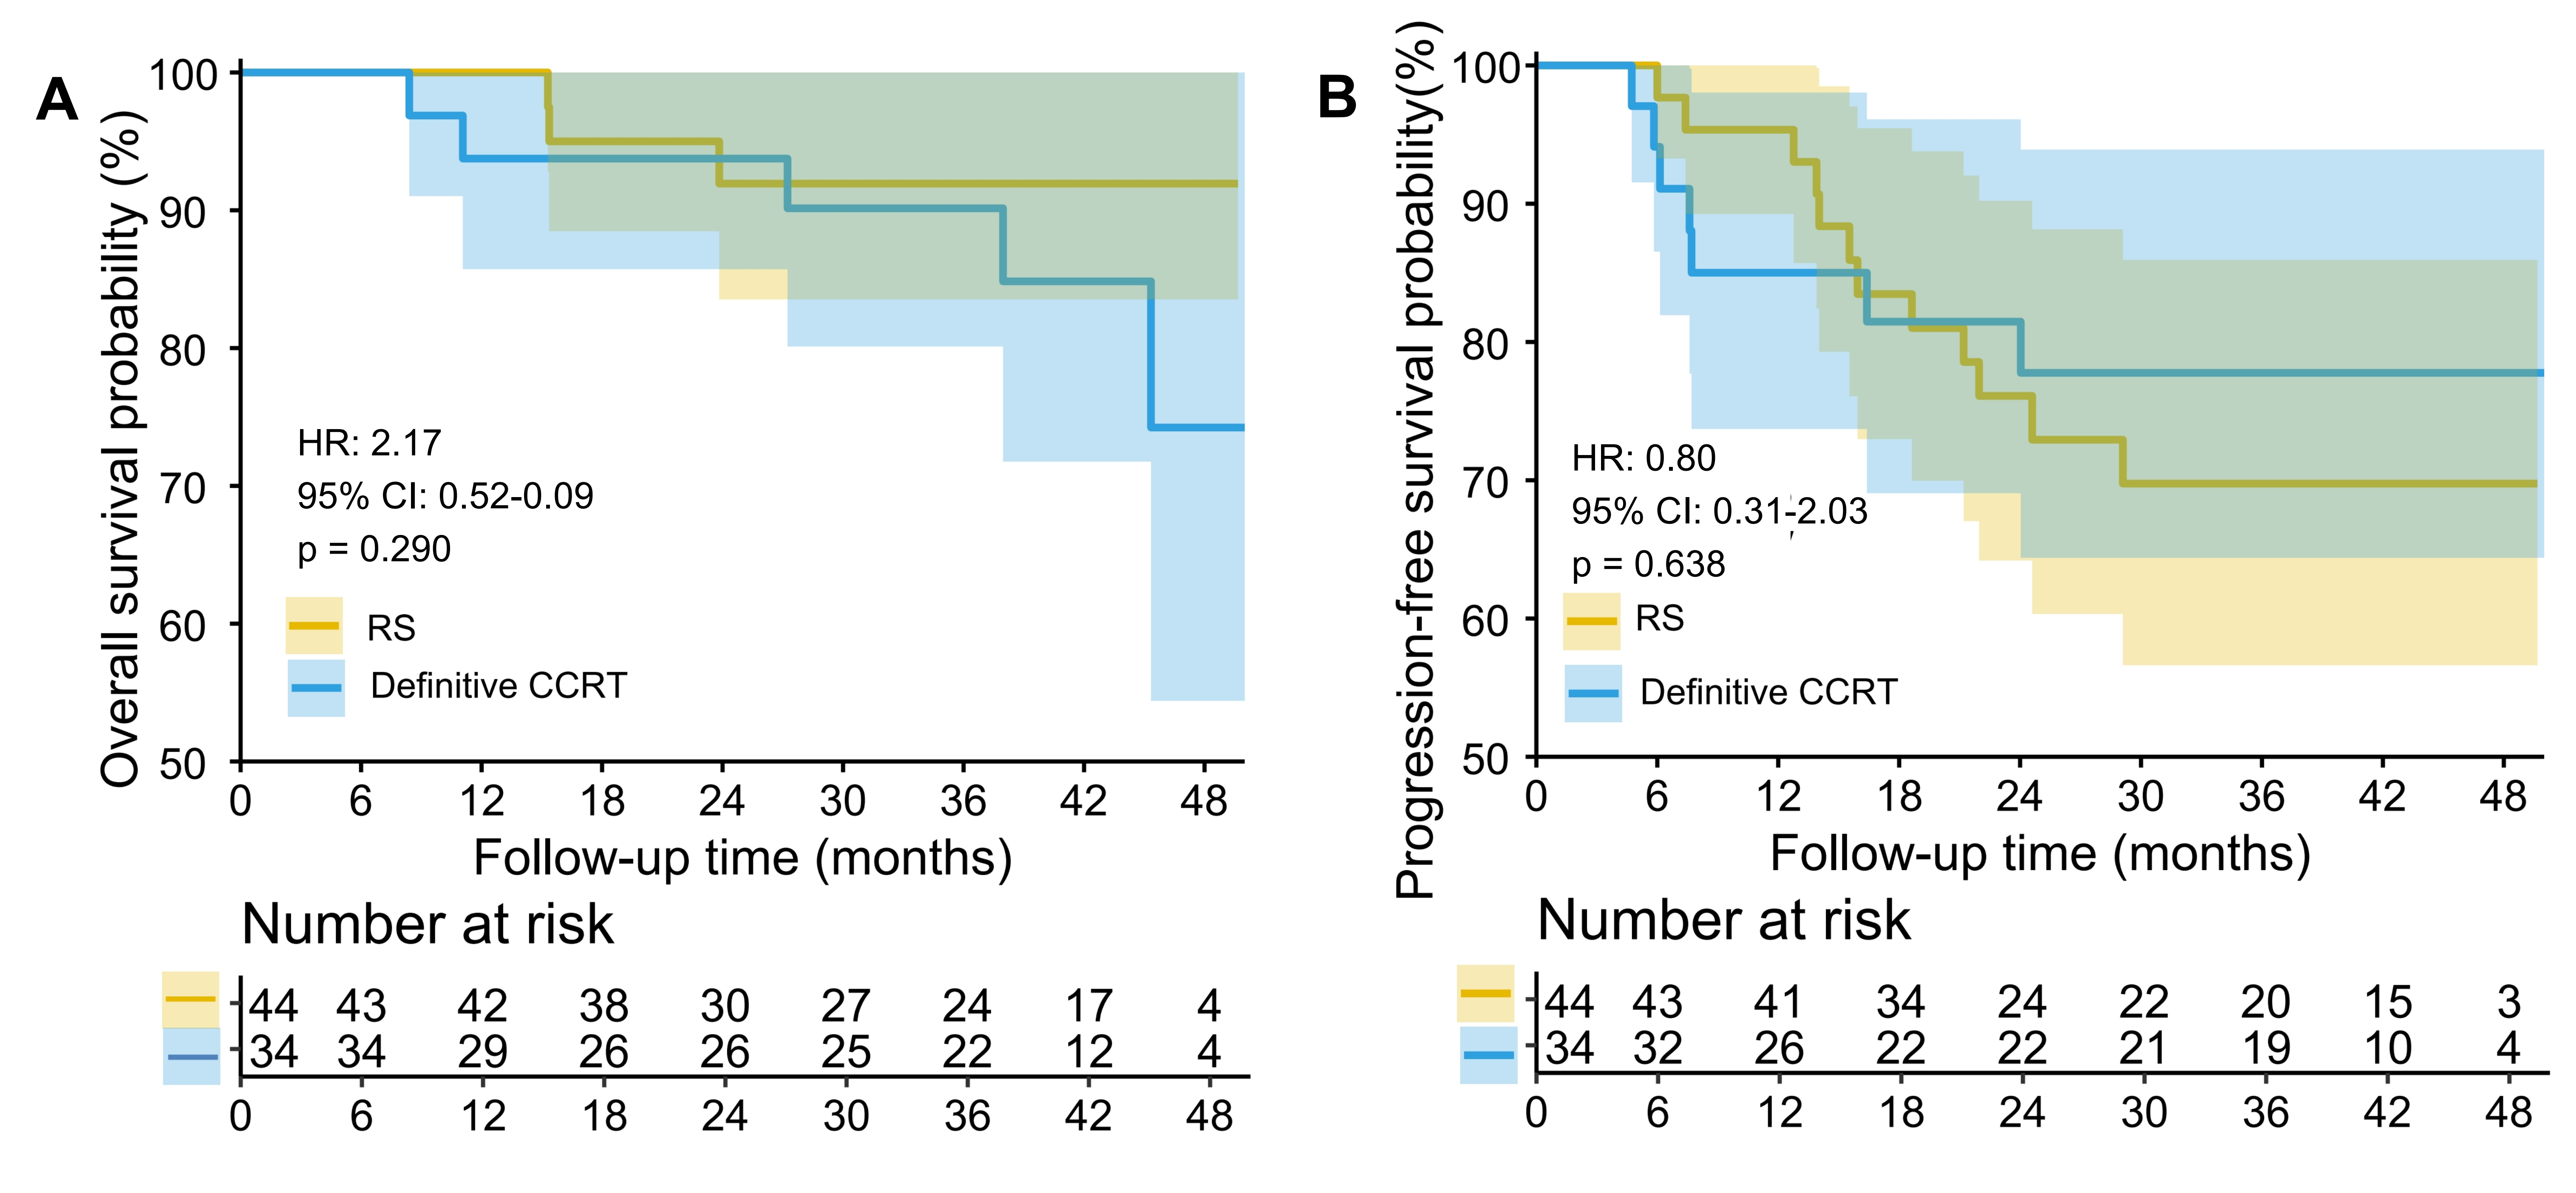


**Supplementary Figure 2. Kaplan-Meier analysis of OS and PFS between the RS subgroup with consistent preoperative and postoperative FIGO staging and the definitive CCRT group after 1:3 PSM.**After 1:3 PSM between the RS group and definitive CCRT group, a subgroup of RS patients with consistent preoperative and postoperative FIGO staging and their matched counterparts in the definitive CCRT group were extracted. Kaplan-Meier analysis revealed no statistically significant differences in OS and PFS between the two groups.


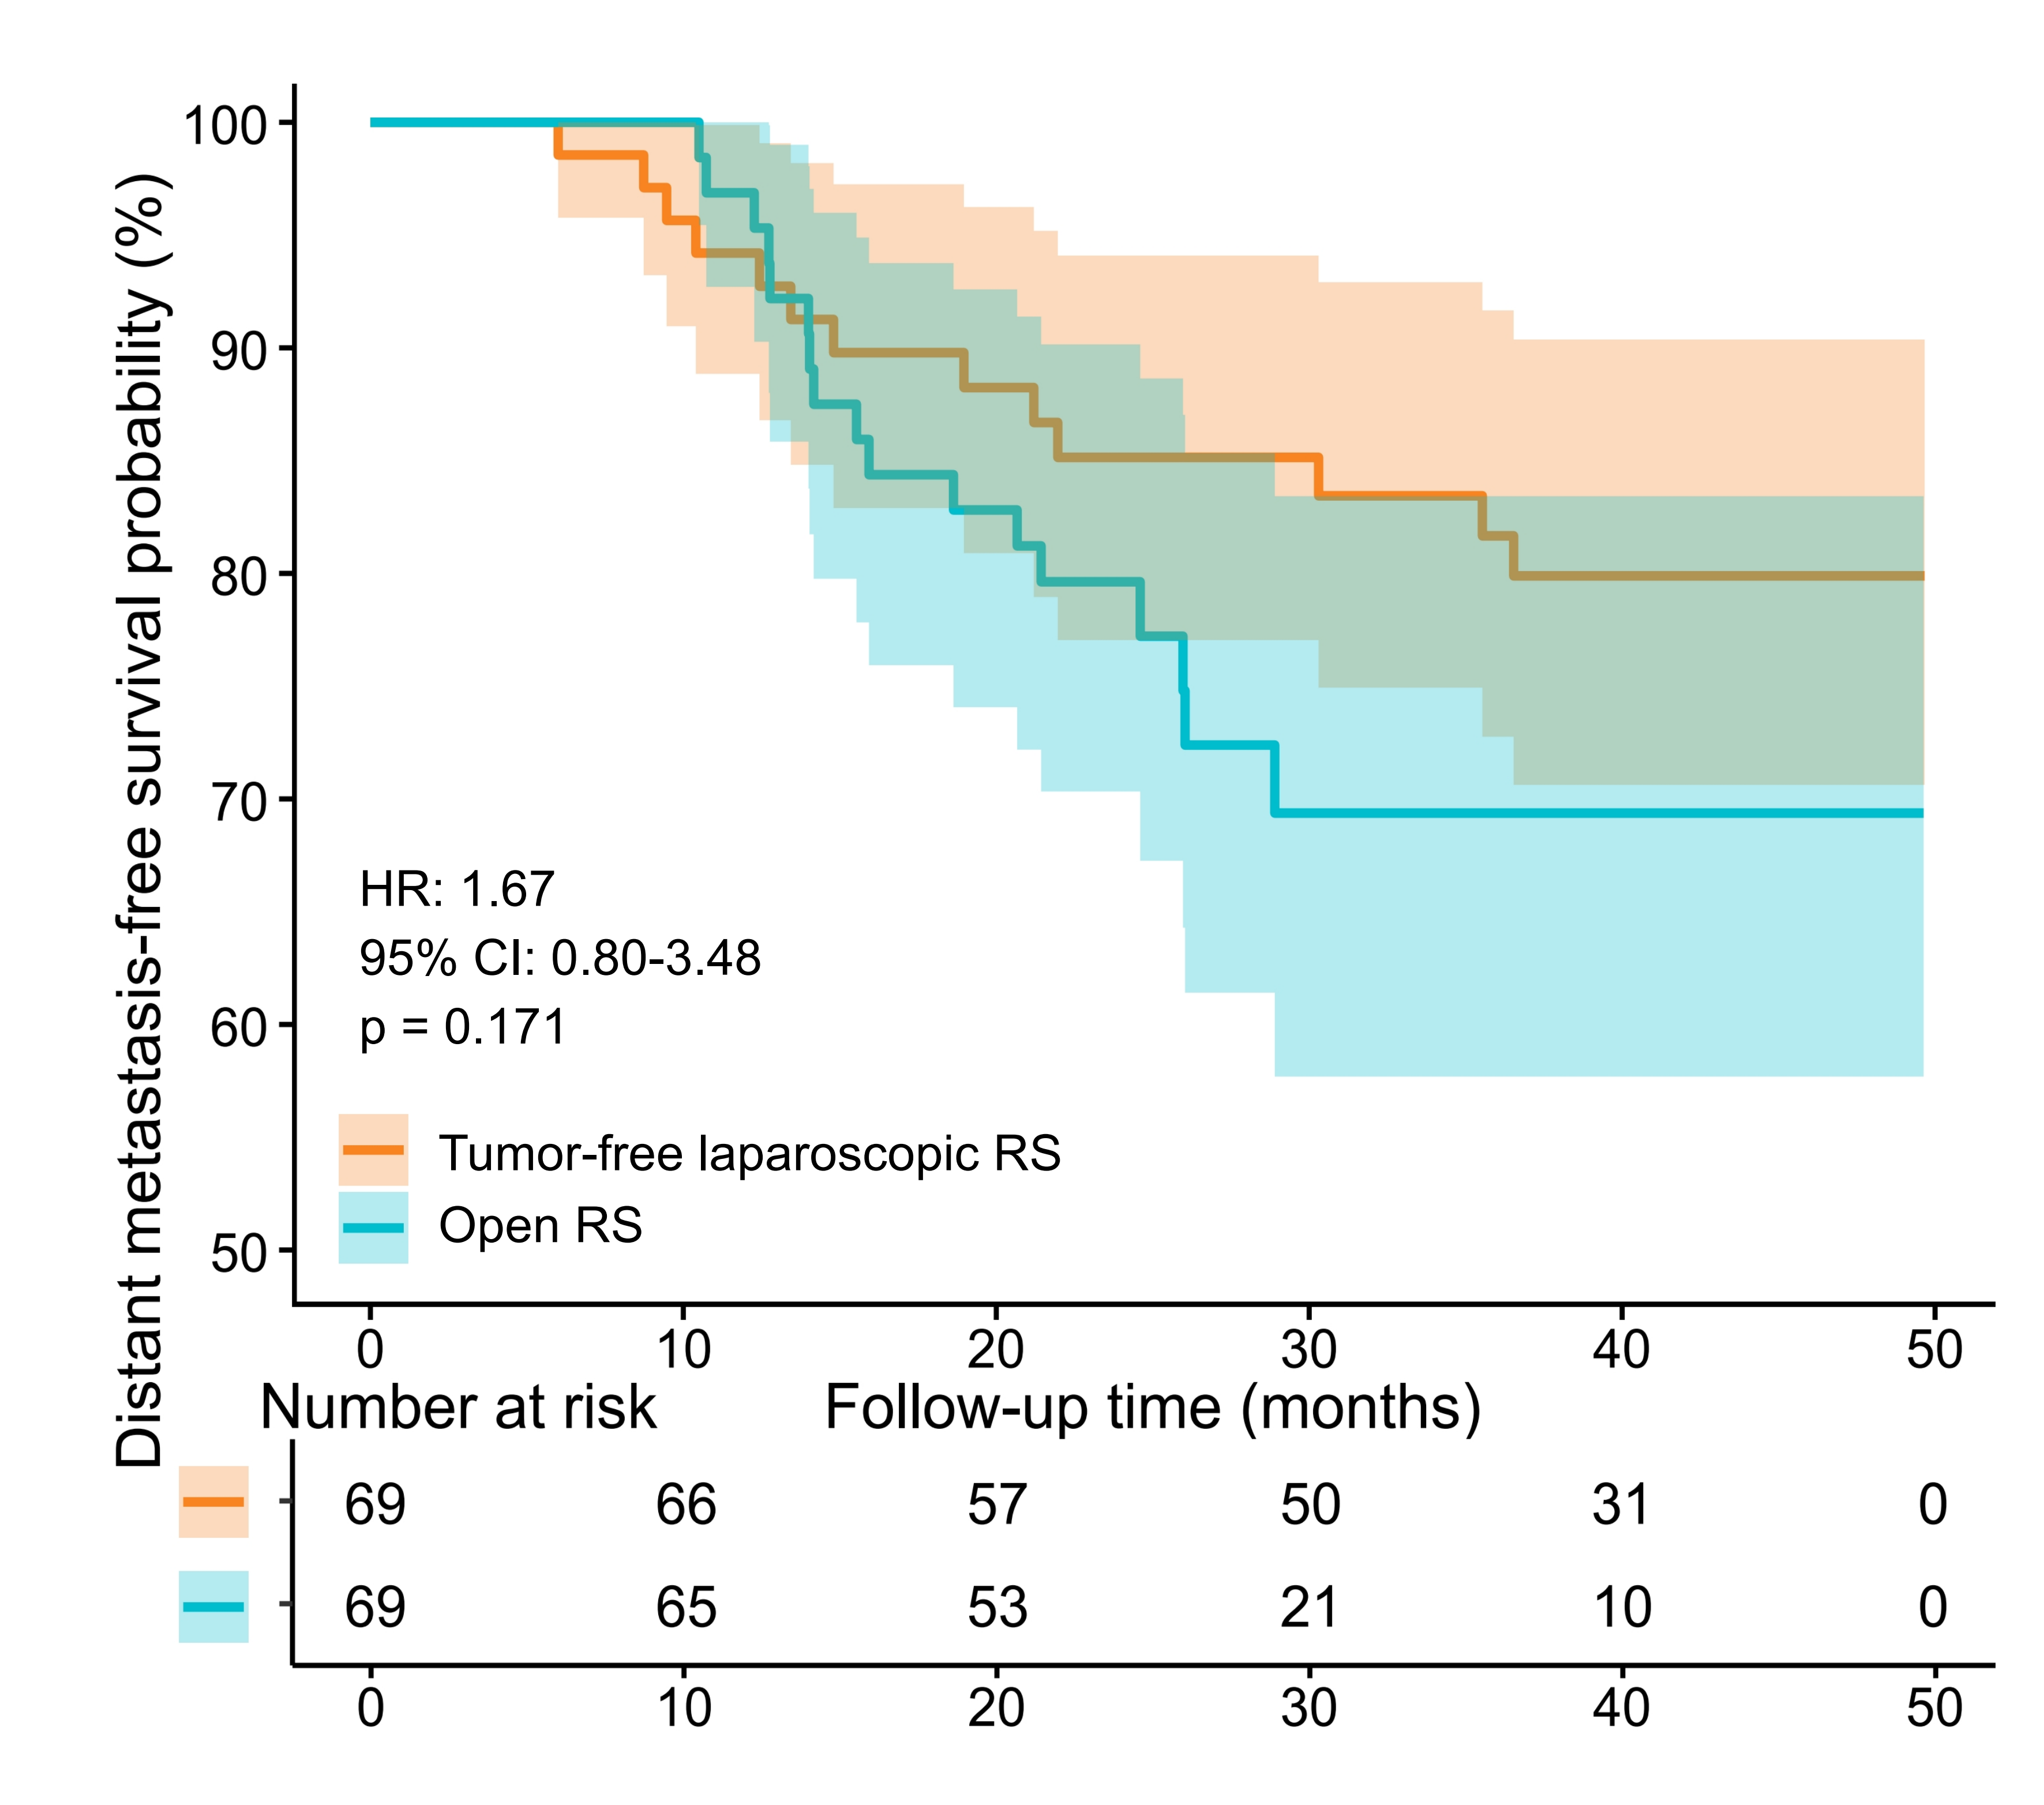


**Supplementary Figure 3. Kaplan-Meier analysis of distant metastasis-free survival (DMFS) between the tumor-free laparoscopic RS group and the open RS group after 1:1 PSM**

The Kaplan-Meier analysis comparing the tumor-free laparoscopic RS group and open RS group after 1:1 PSM showed no statistically significant differences in distant metastasis-free survival between the two groups.

**
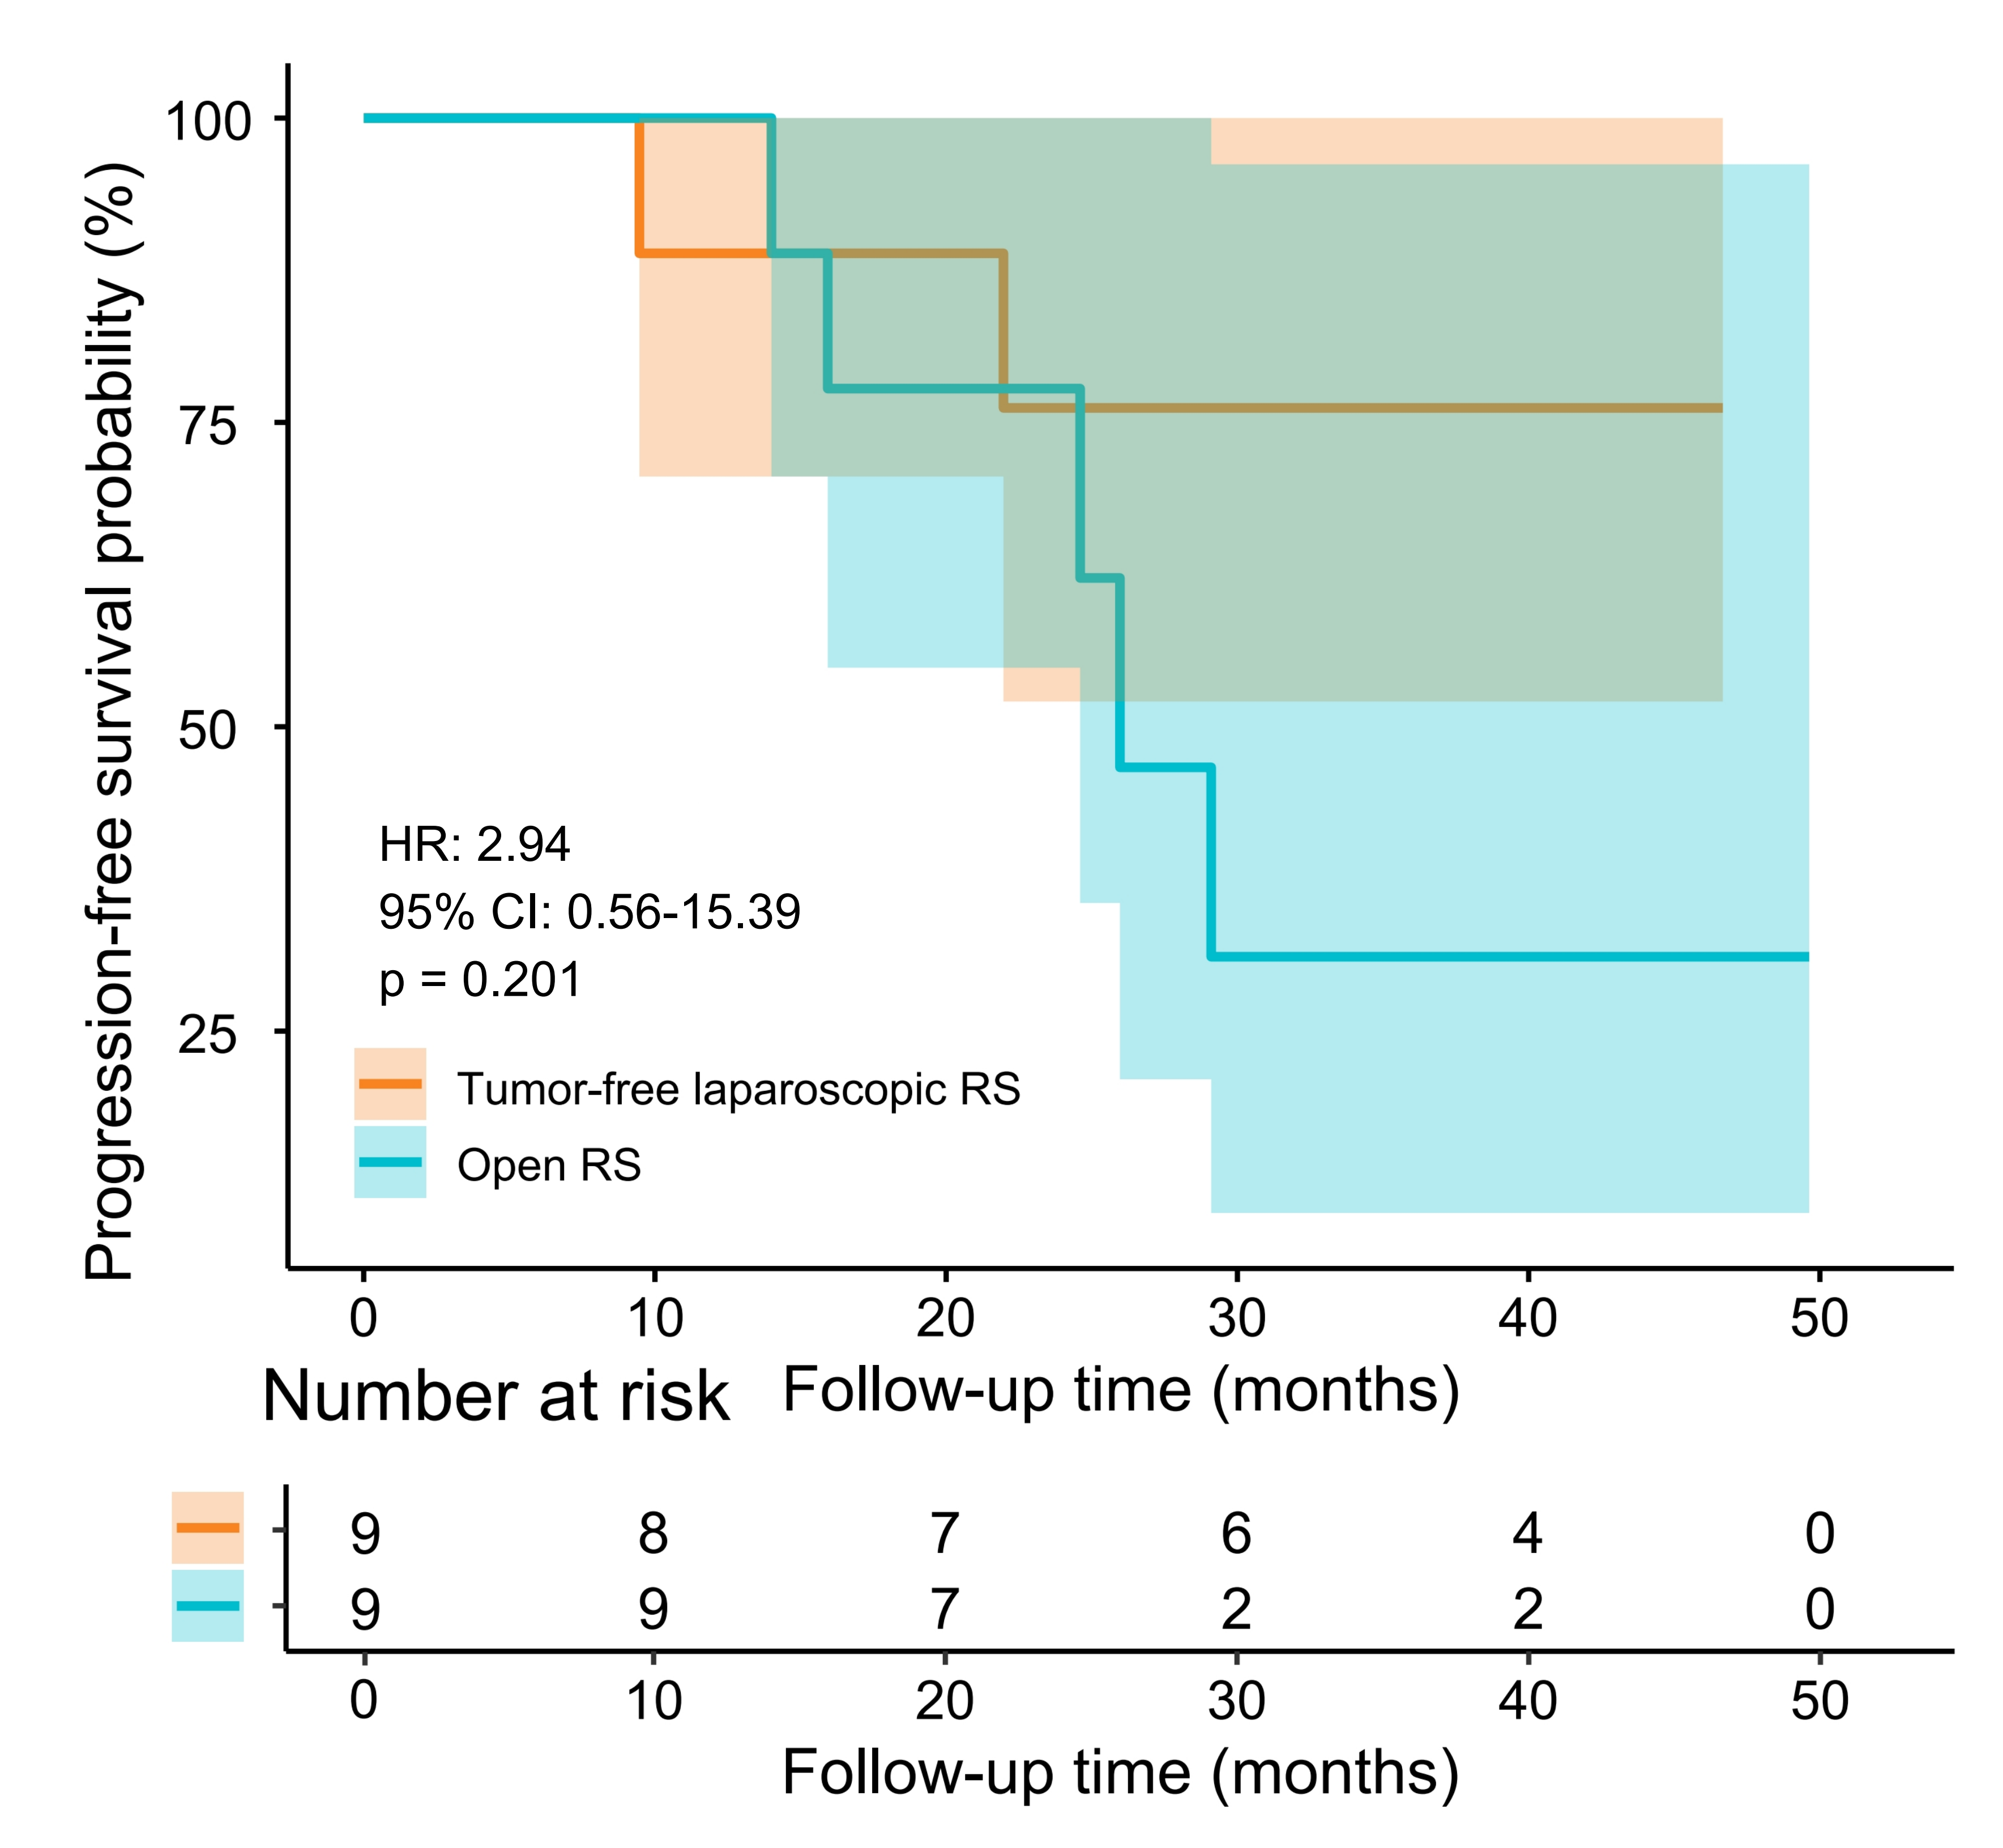
**

**Supplementary Figure 4. Kaplan–Meier analysis of PFS between the tumor-free laparoscopic RS subgroup with consistent preoperative and postoperative FIGO staging and the definitive CCRT group after 1:3 PSM.**After 1:3 PSM between the RS group and definitive CCRT group, a subgroup of the tumor-free laparoscopic RS patients with consistent preoperative and postoperative FIGO staging and their matched counterparts in the definitive CCRT group were extracted. Kaplan-Meier analysis revealed no statistically significant differences in PFS between the two groups. (No death events occurred, making OS comparisons impossible.)


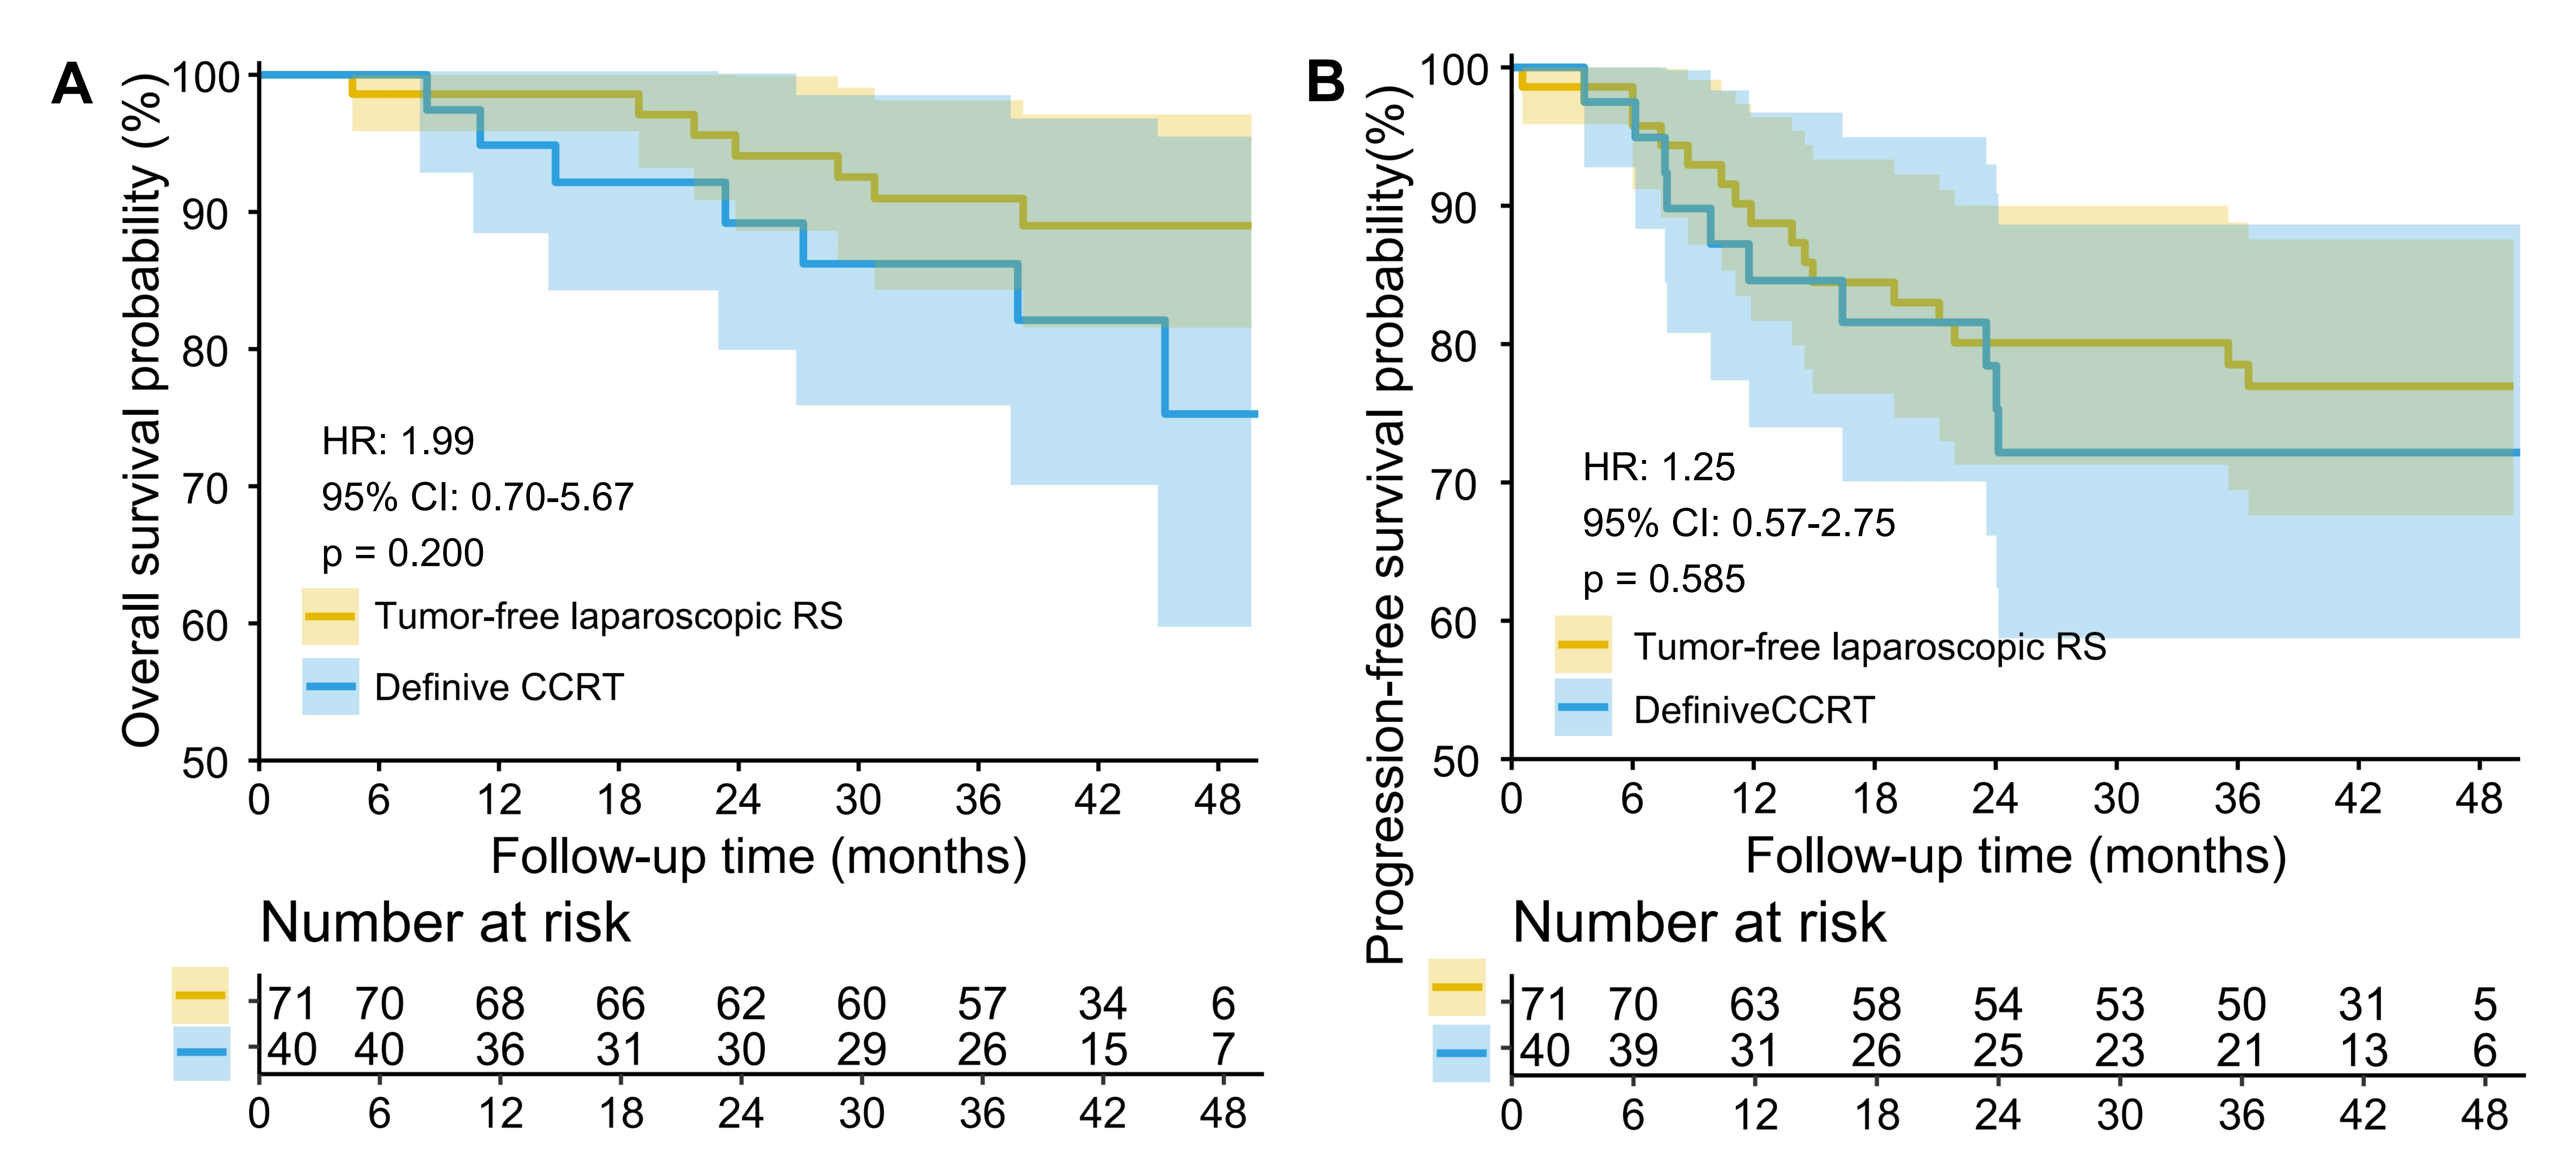


**Supplementary Figure 5. Subgroup Kaplan-Meier analysis of OS and PFS between the tumor-free laparoscopic RS group and the definitive CCRT group after 1:3 PSM**

After 1:3 PSM between the RS group and definitive CCRT group, a subgroup of patients who underwent tumor-free laparoscopy RS and their matched counterparts in the definitive CCRT group were extracted. Kaplan-Meier analysis revealed no statistically significant differences in OS and PFS between the two groups.

**
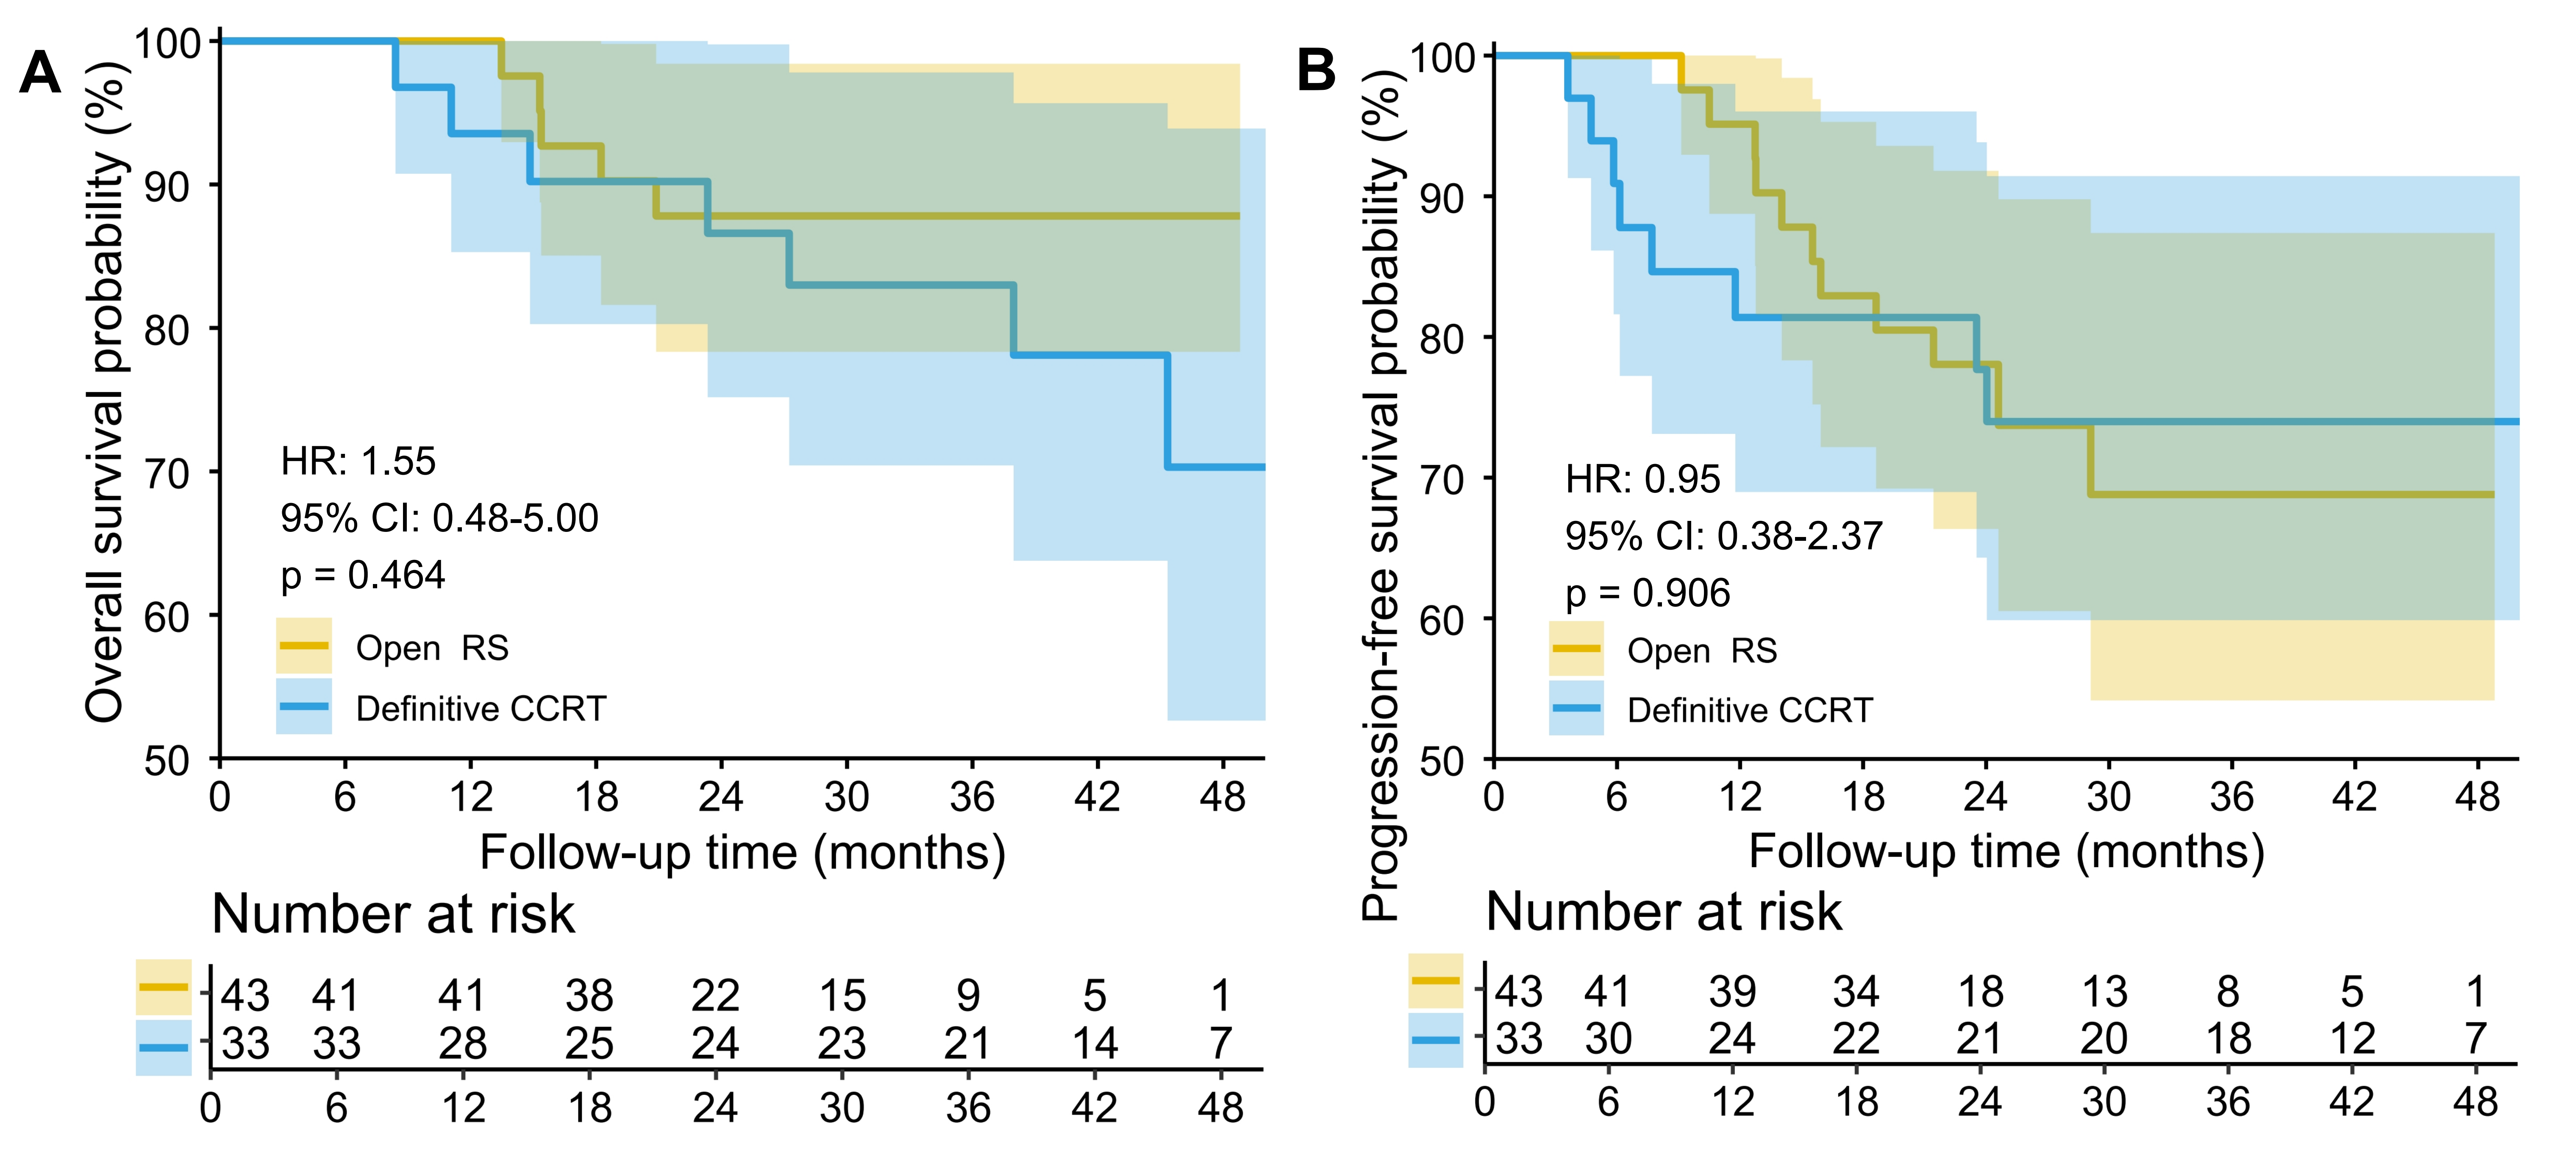
**

**Supplementary Figure 6. Subgroup Kaplan-Meier analysis of OS and PFS between the open RS group and the definitive CCRT group after 1:3 PSM**

After 1:3 PSM between the RS group and definitive CCRT group, a subgroup of patients who underwent open RS and their matched counterparts in the definitive CCRT group were extracted. Kaplan-Meier analysis revealed no statistically significant differences in OS and PFS between the two groups.

**
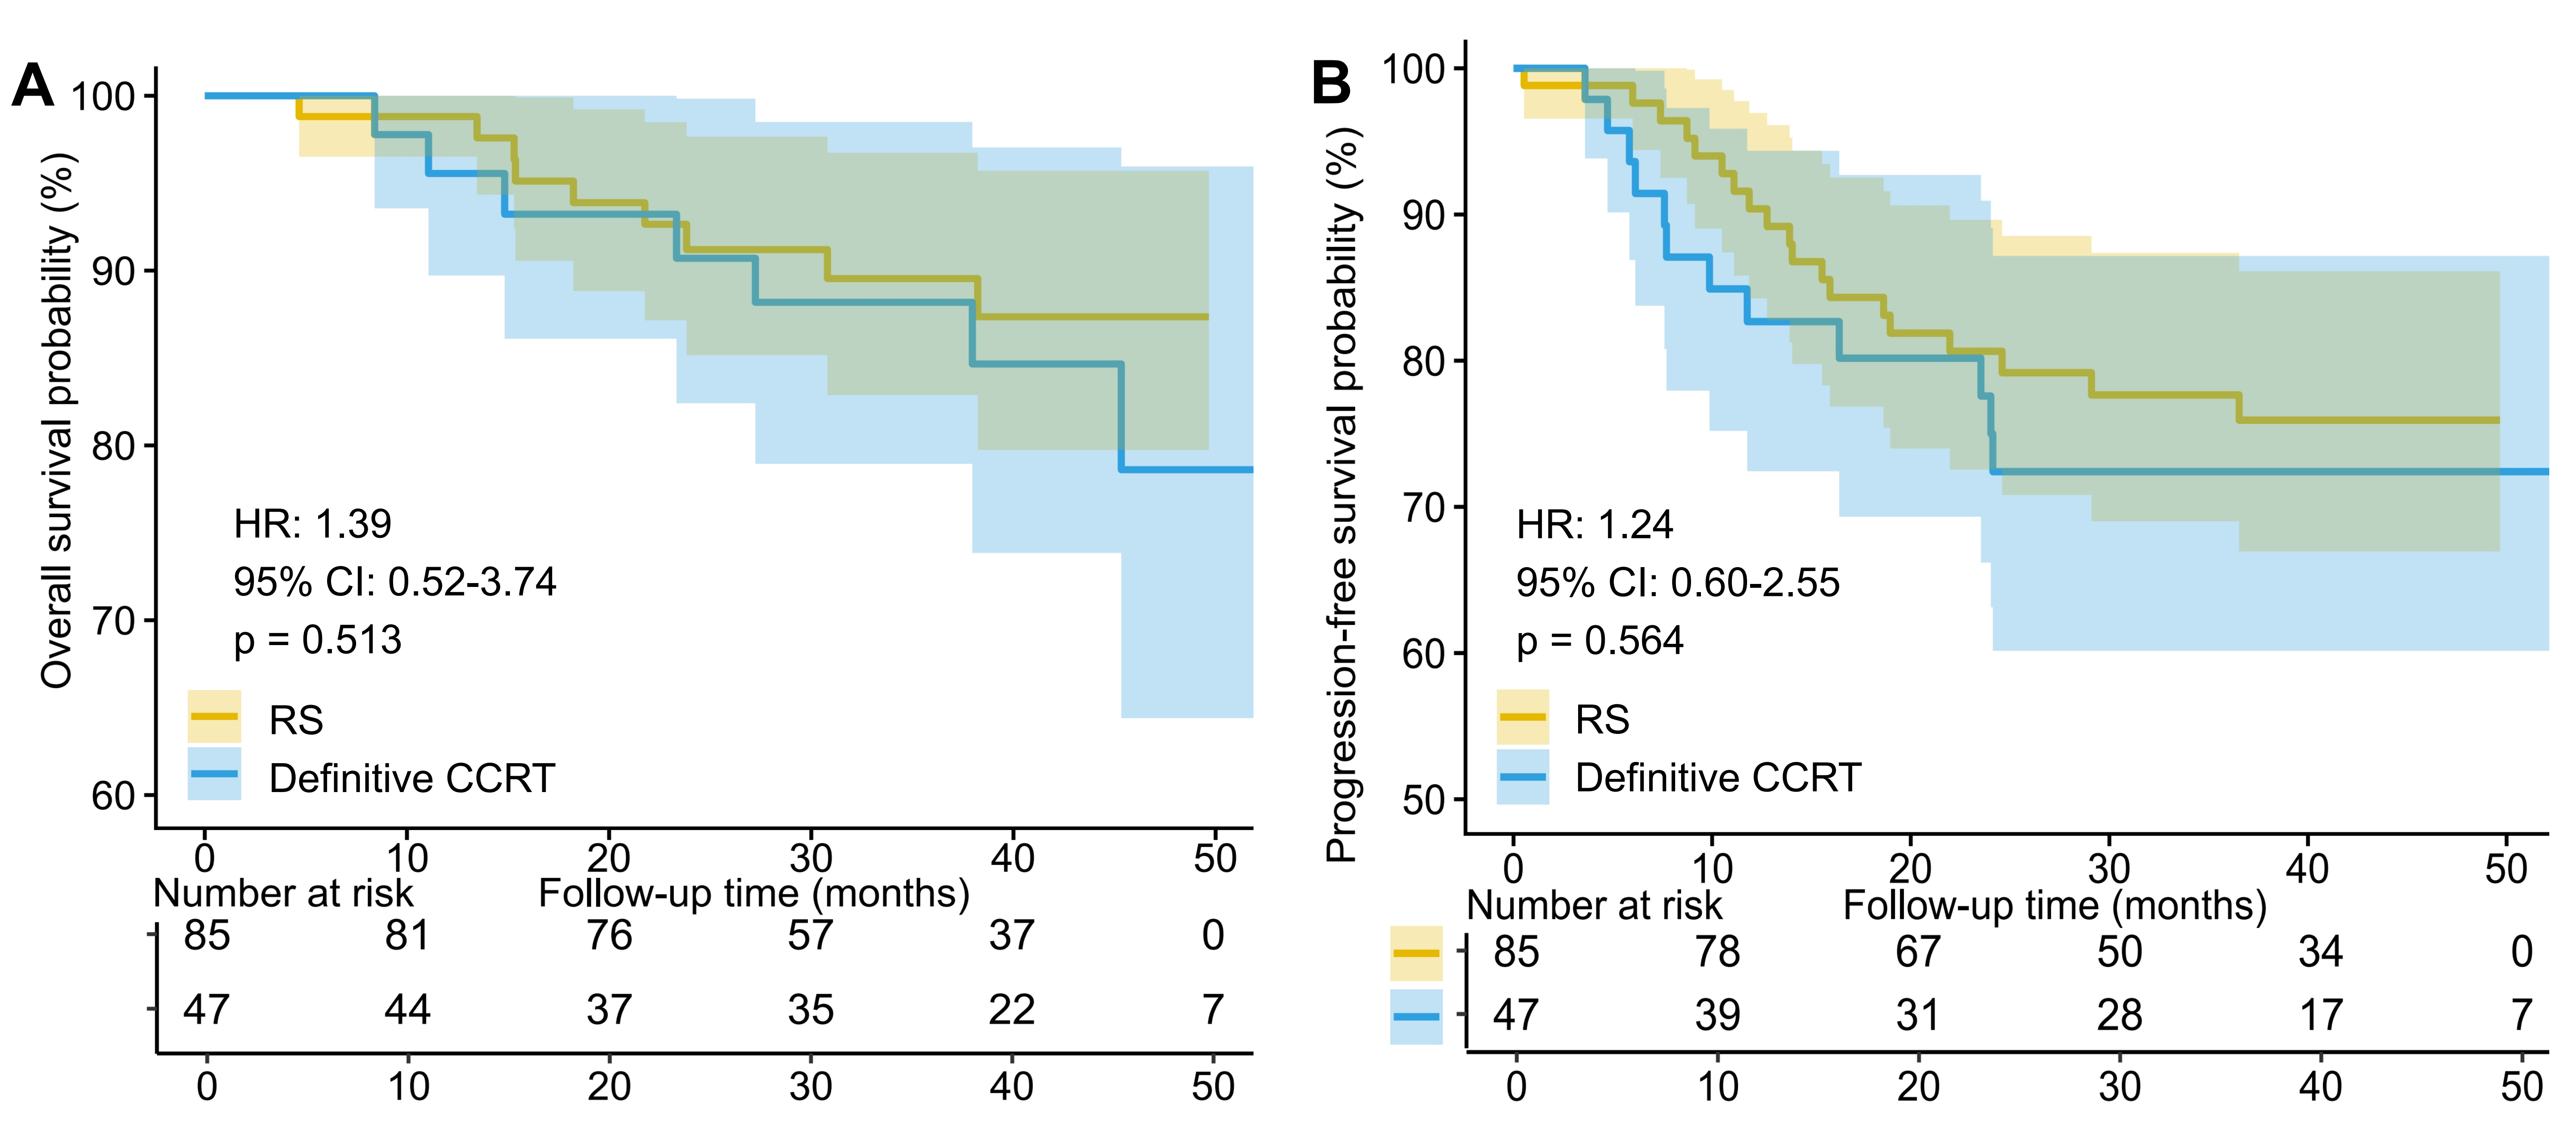
**

**Supplementary Figure 7. Kaplan-Meier analysis of OS and PFS between the RS group and the definitive CCRT group after 1:2 PSM**

After a 1:2 PSM between the RS group and definitive CCRT group, no significant differences in OS or PFS were observed.
